# Supplementary material for: Optimization of incubation conditions of Plasmodium falciparum antibody multiplex assays to measure IgG, IgG1–4, IgM and IgE using standard and customized reference pools for sero-epidemiological and vaccine studies
Source: PubMed Central journal article supplement (PMC5984756; doi:10.1186/s12936-018-2369-3), 2018-06-01

## IgG

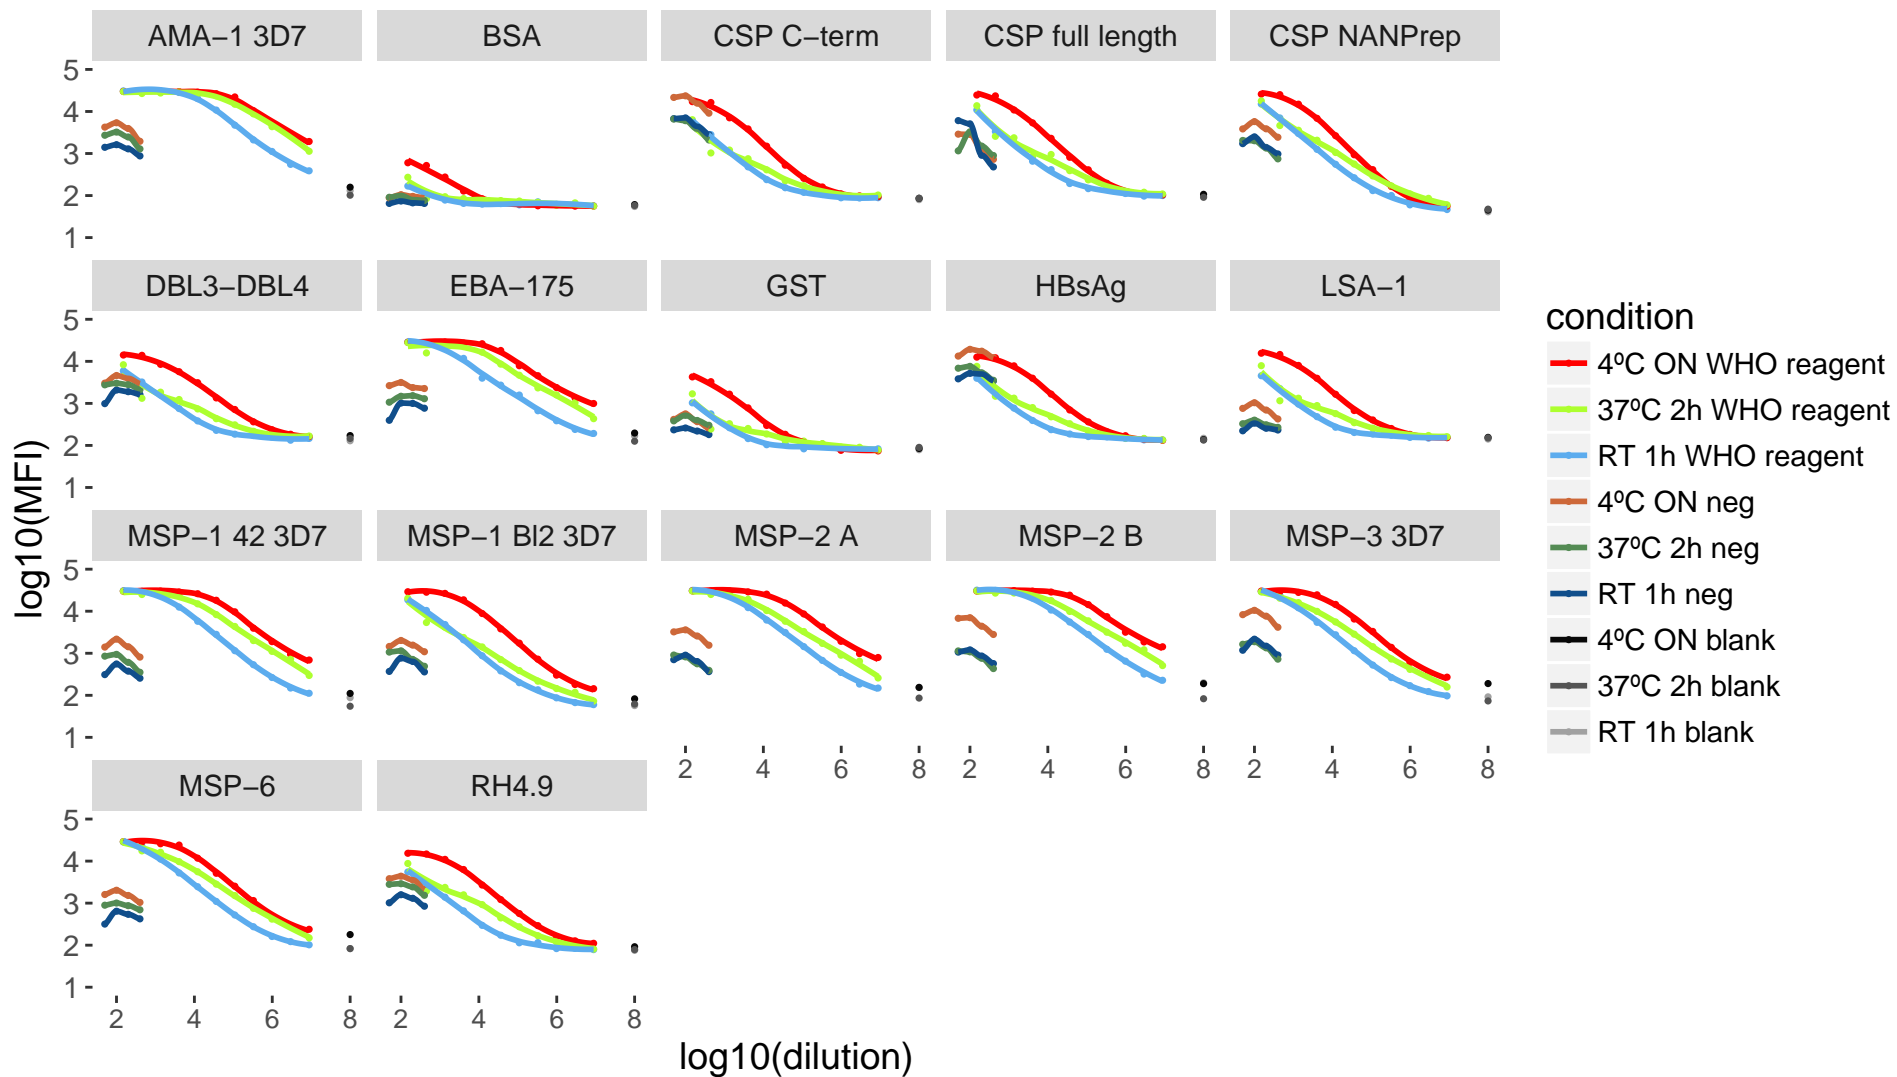

## IgG3

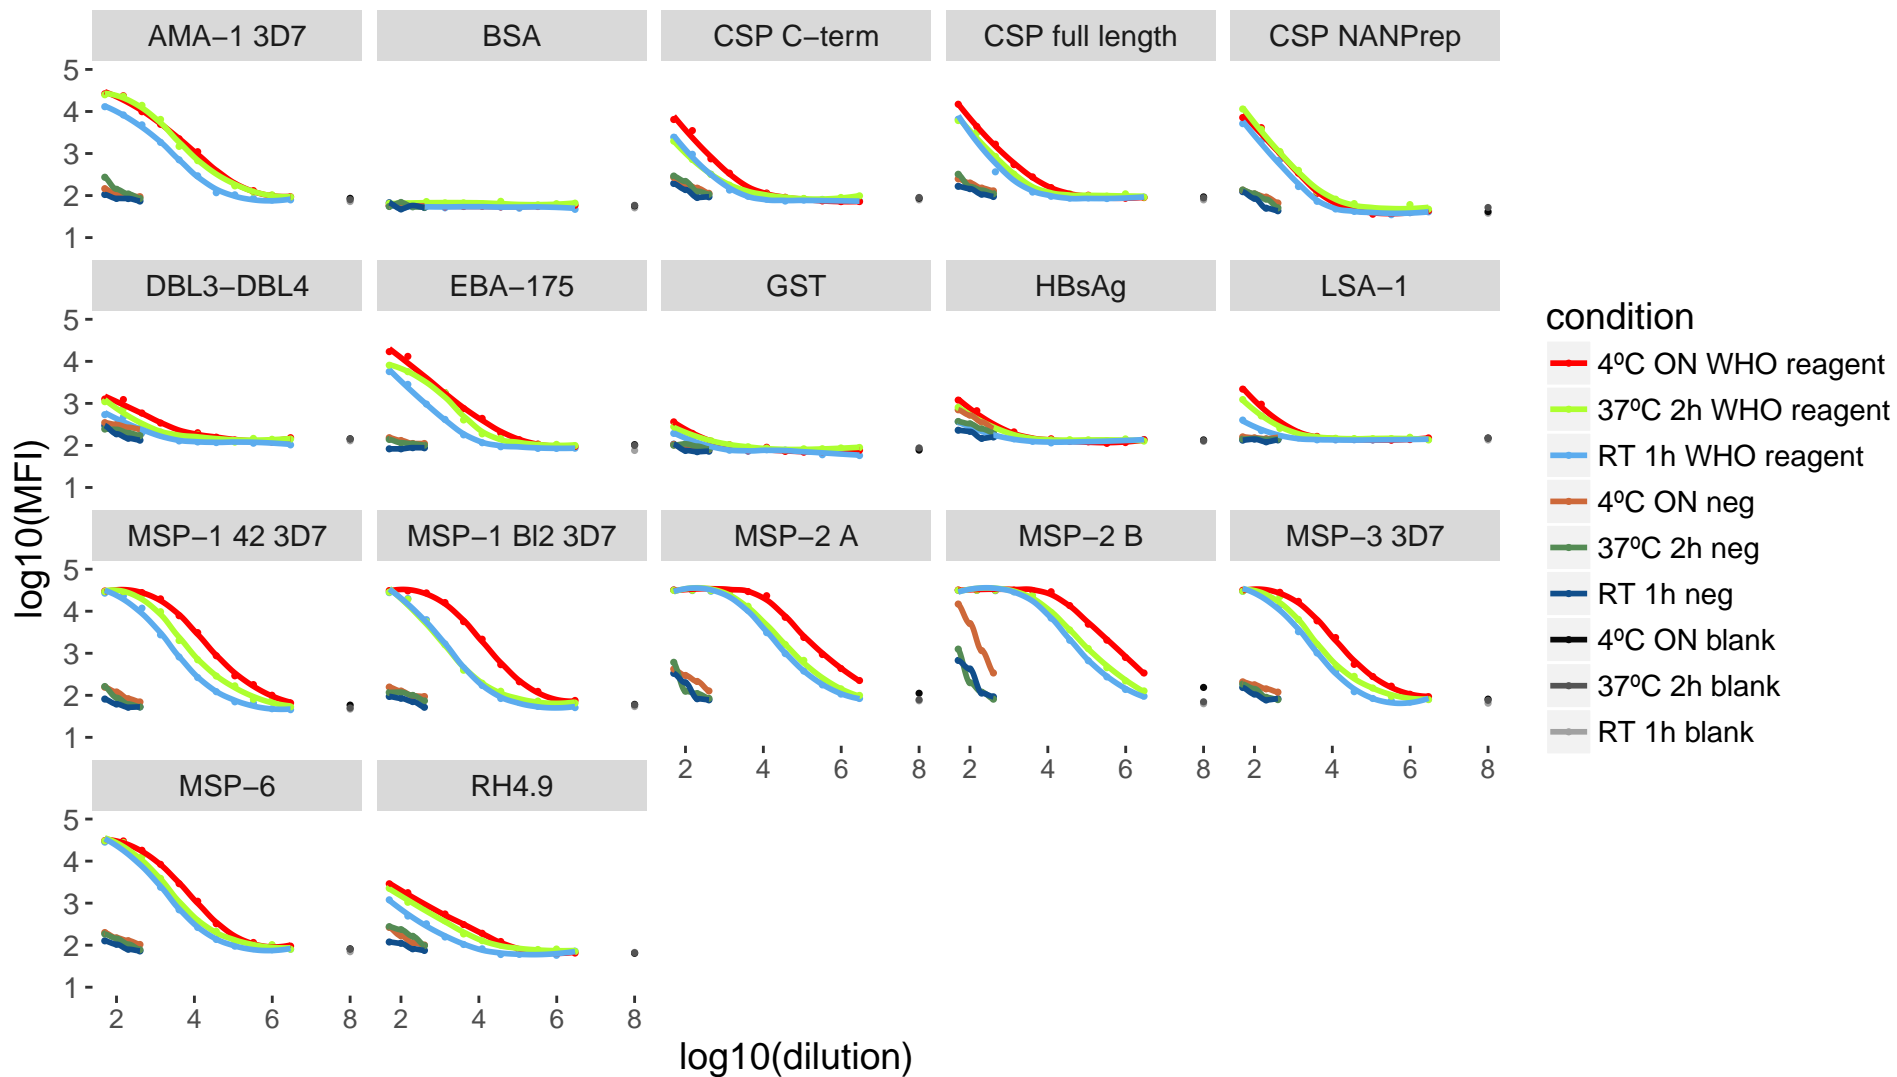

## IgG2

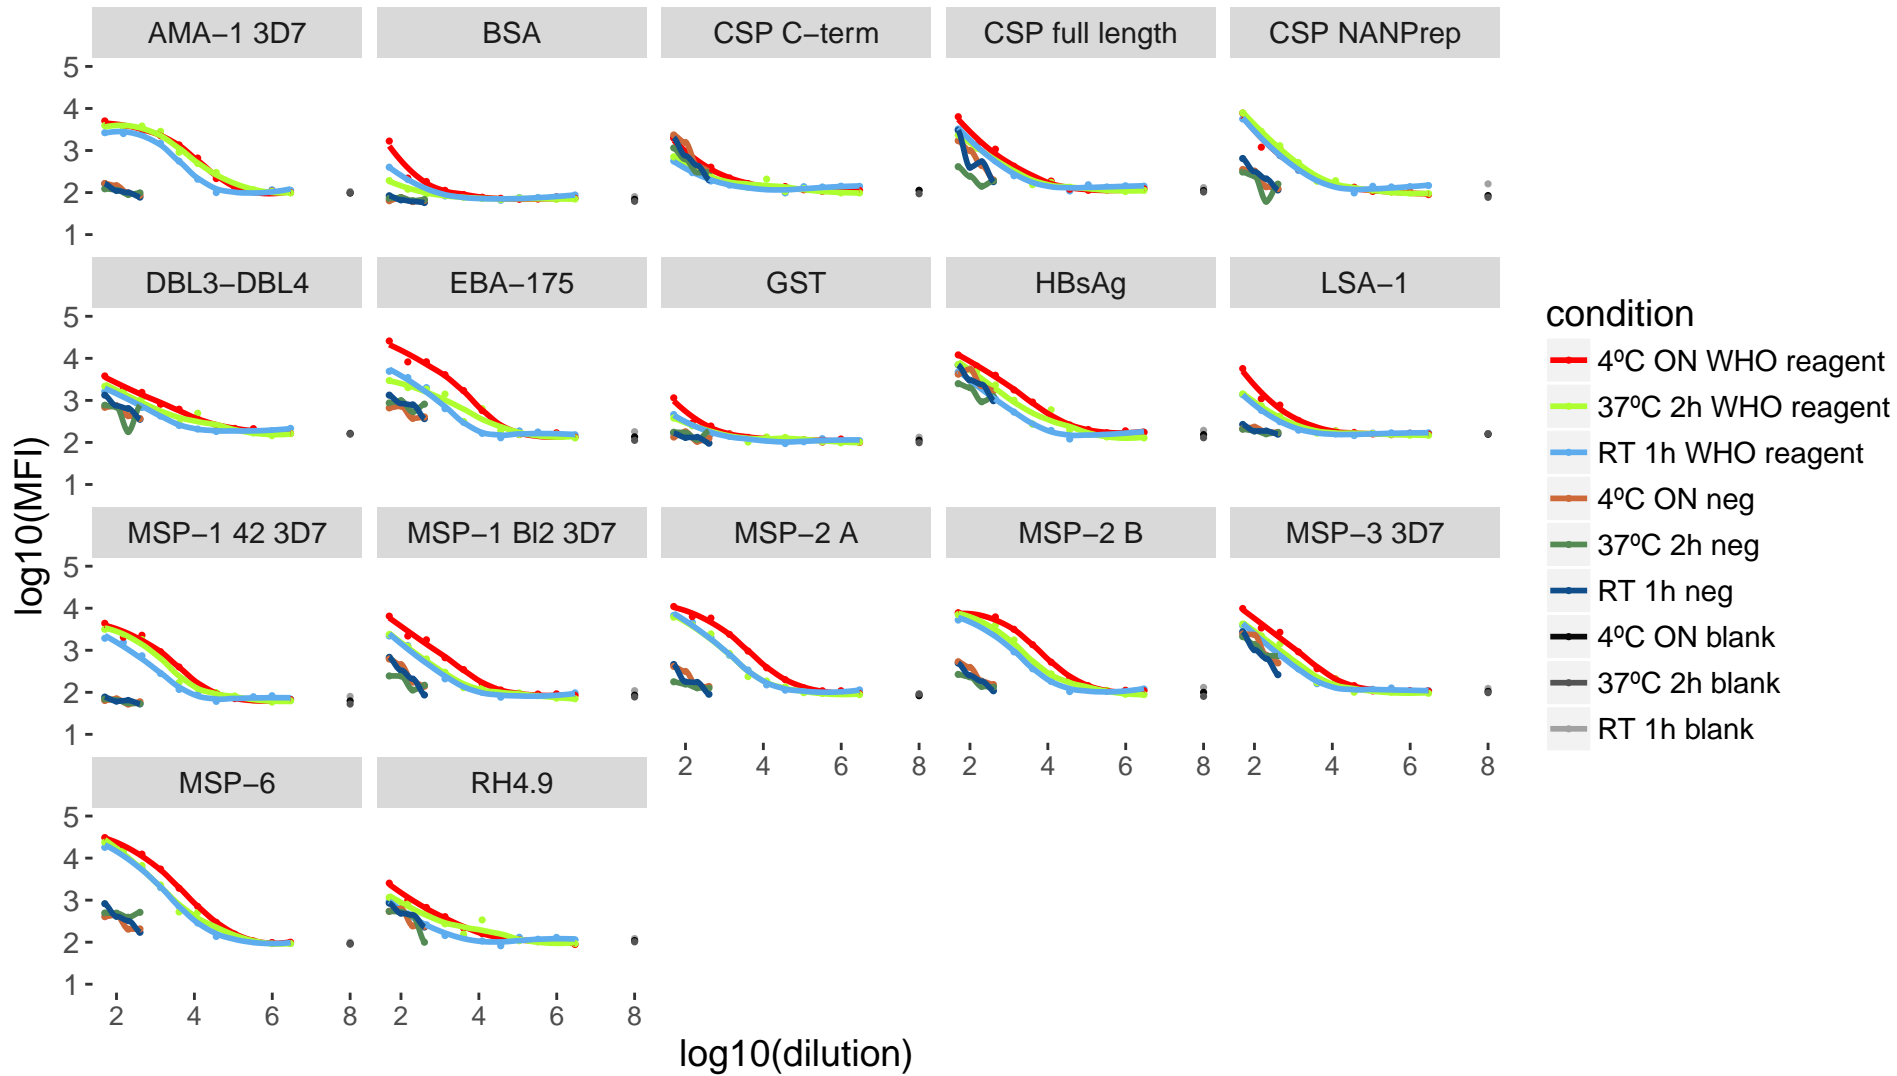

## IgG4

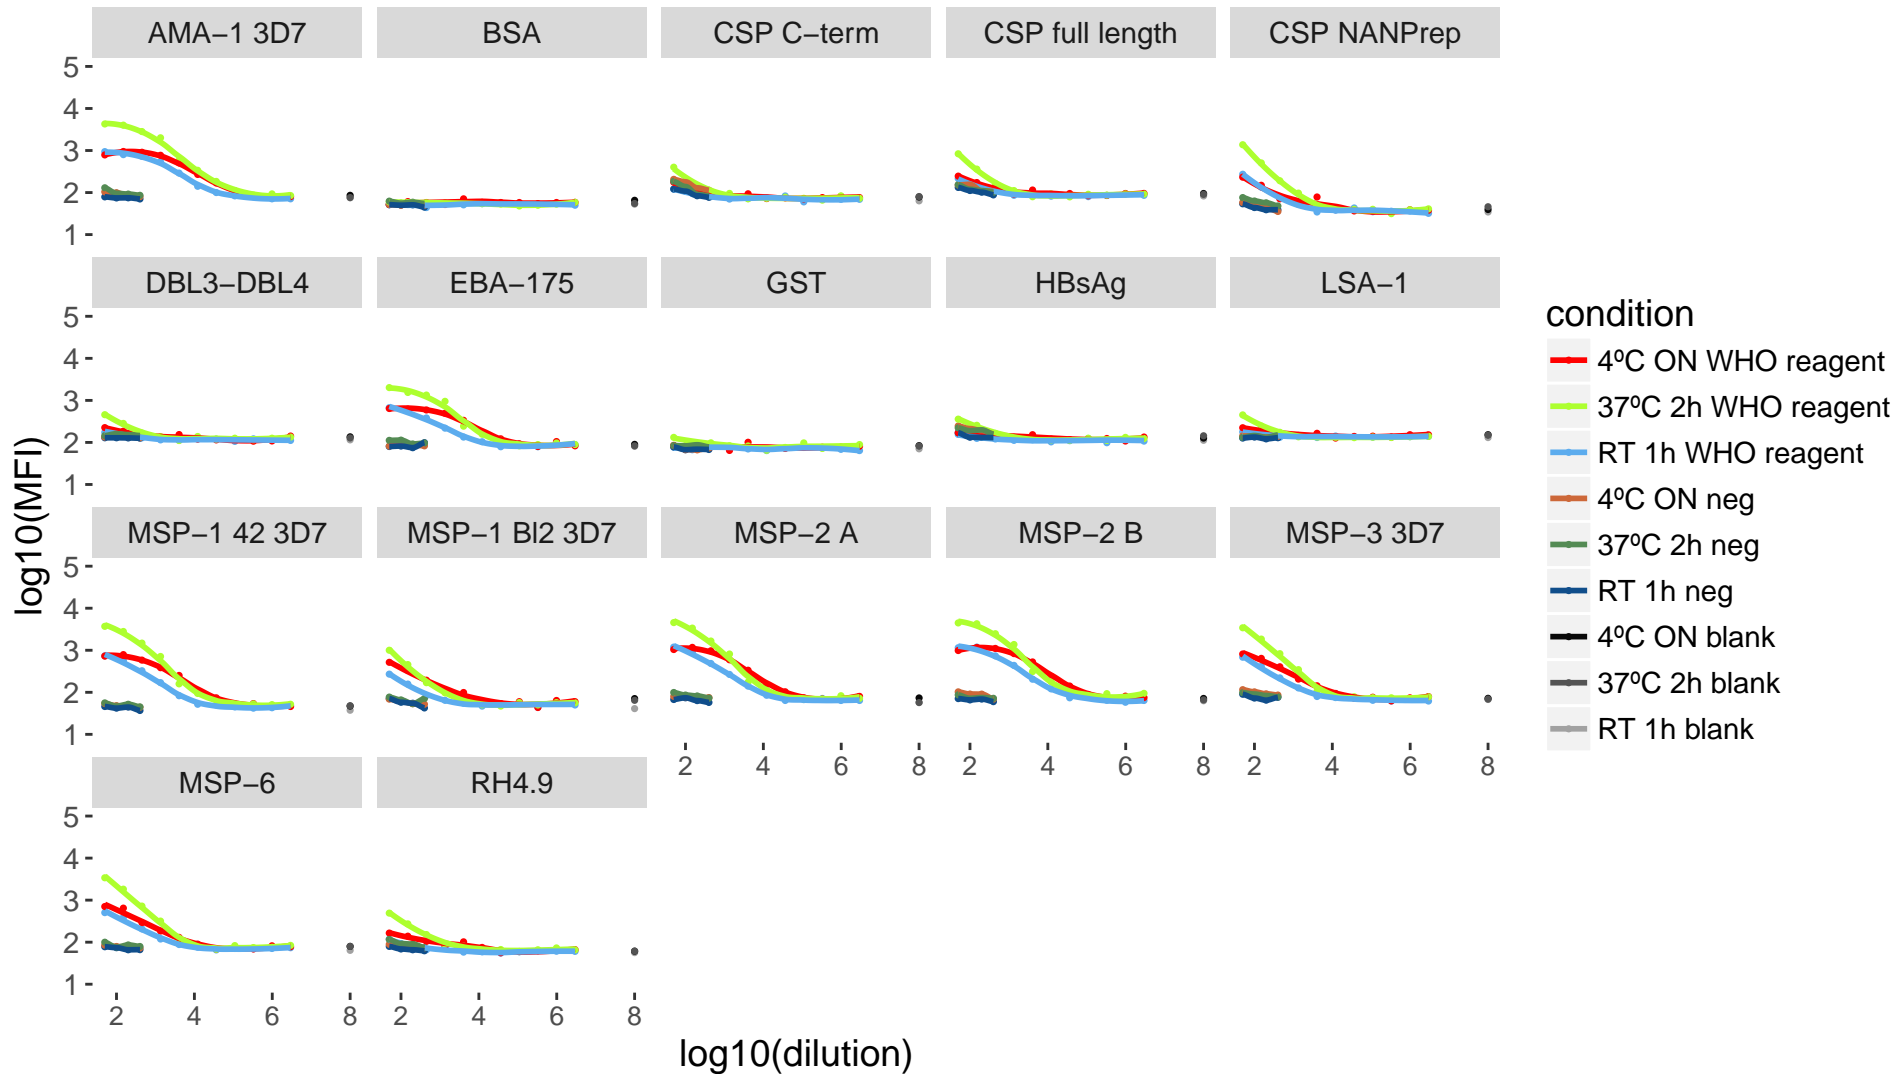

Supplement: 12936_2018_2369_MOESM6_ESM.pdf [file 12936_2018_2369_MOESM6_ESM.pdf]
