# Supplementary material for: Optimization of incubation conditions of Plasmodium falciparum antibody multiplex assays to measure IgG, IgG1–4, IgM and IgE using standard and customized reference pools for sero-epidemiological and vaccine studies
Source: Springer Nature journal article supplement (doi:10.1186/s12936-018-2369-3), 2018-06-01
Supplement: MOESM4 [file 15812434]

|          |                 | WHO Reference reagent pool |                |          | WHO-CSP pool |                |          |                                                              |
|----------|-----------------|----------------------------|----------------|----------|--------------|----------------|----------|--------------------------------------------------------------|
| IgG type | Analyte         | EC50                       | EC50 Std Error | Function | EC50         | EC50 Std Error | Function | RATIO<br>(EC50 <sub>WHO</sub> /<br>EC50 <sub>WHO-CSP</sub> ) |
| IgG      | CSP C-term      | 2.863                      | 0.147          | SSI4     | 5.398        | 0.062          | SSI4     | 0.530                                                        |
| IgG      | CSP full length | 3.197                      | 0.150          | SSI4     | 5.636        | 0.063          | SSI4     | 0.567                                                        |
| IgG      | CSP NANPrep     | 3.235                      | 0.201          | SSI4     | 5.499        | 0.034          | SSI4     | 0.588                                                        |
| IgG      | GST             | 2.693                      | 0.260          | SSI4     | 4.824        | 0.057          | SSI4     | 0.558                                                        |
| IgG      | HBsAg           | 3.547                      | 0.089          | SSI4     | 4.209        | 0.040          | SSI4     | 0.843                                                        |
| IgG1     | CSP C-term      | 2.023                      | 0.095          | SSI4     | 4.597        | 0.032          | SSI4     | 0.440                                                        |
| IgG1     | CSP full length | 2.393                      | 0.114          | SSI4     | NA           | NA             | SSexp    |                                                              |
| IgG1     | CSP NANPrep     | 2.407                      | 0.261          | SSI4     | 4.835        | 0.015          | SSI4     | 0.498                                                        |
| IgG1     | GST             | 0.188                      | 3.477          | SSI4     | 3.877        | 0.048          | SSI4     | 0.049                                                        |
| IgG1     | HBsAg           | 1.977                      | 0.140          | SSI4     | 2.945        | 0.028          | SSI4     | 0.671                                                        |
| IgG2     | CSP C-term      | 1.806                      | 0.358          | SSI4     | 3.565        | 0.254          | SSI4     | 0.507                                                        |
| IgG2     | CSP full length | 1.723                      | 0.505          | SSI4     | 1.789        | 0.543          | SSI4     | 0.963                                                        |
| IgG2     | CSP NANPrep     | 1.971                      | 0.274          | SSI4     | NA           | NA             | SSexp    |                                                              |
| IgG2     | GST             | NA                         | NA             | SSexp    | NA           | NA             | SSexp    |                                                              |
| IgG2     | HBsAg           | 2.746                      | 0.035          | SSI4     | 2.694        | 0.116          | SSI4     | 1.019                                                        |
| IgG3     | CSP C-term      | 2.020                      | 0.050          | SSI4     | 3.548        | 0.039          | SSI4     | 0.569                                                        |
| IgG3     | CSP full length | 1.949                      | 0.193          | SSI4     | 4.166        | 0.105          | SSI4     | 0.468                                                        |
| IgG3     | CSP NANPrep     | 1.947                      | 0.069          | SSI4     | 4.141        | 0.048          | SSI4     | 0.470                                                        |
| IgG3     | GST             | NA                         | NA             | SSexp    | 2.632        | 0.217          | SSI4     |                                                              |
| IgG3     | HBsAg           | NA                         | NA             | SSexp    | 2.085        | 0.424          | SSI4     |                                                              |
| IgG4     | CSP C-term      | NA                         | NA             | SSexp    | NA           | NA             | SSexp    |                                                              |
| IgG4     | CSP full length | NA                         | NA             | SSexp    | 3.393        | 0.222          | SSI4     |                                                              |
| IgG4     | CSP NANPrep     | NA                         | NA             | SSexp    | 3.284        | 0.104          | SSI4     |                                                              |
| IgG4     | GST             | 2.599                      | 25526.704      | SSI4     | 1.787        | 3.217          | SSI4     | 1.454                                                        |
| IgG4     | HBsAg           | NA                         | NA             | SSexp    | 3.526        | 107889.523     | SSI4     |                                                              |
