# Supplementary material for: Optimization of incubation conditions of Plasmodium falciparum antibody multiplex assays to measure IgG, IgG1–4, IgM and IgE using standard and customized reference pools for sero-epidemiological and vaccine studies
Source: Springer Nature journal article supplement (doi:10.1186/s12936-018-2369-3), 2018-06-01
Supplement: MOESM5 [file 15812434]

RTS,S vaccinees (n=129)

### RTS,S antigens

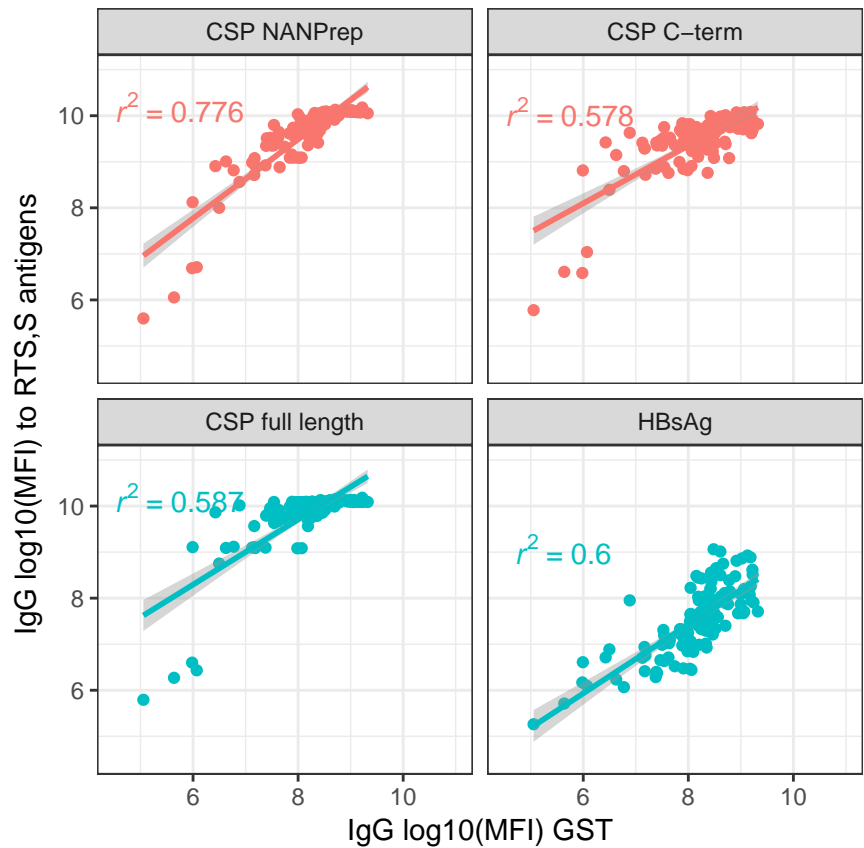

### Non-RTS,S antigens

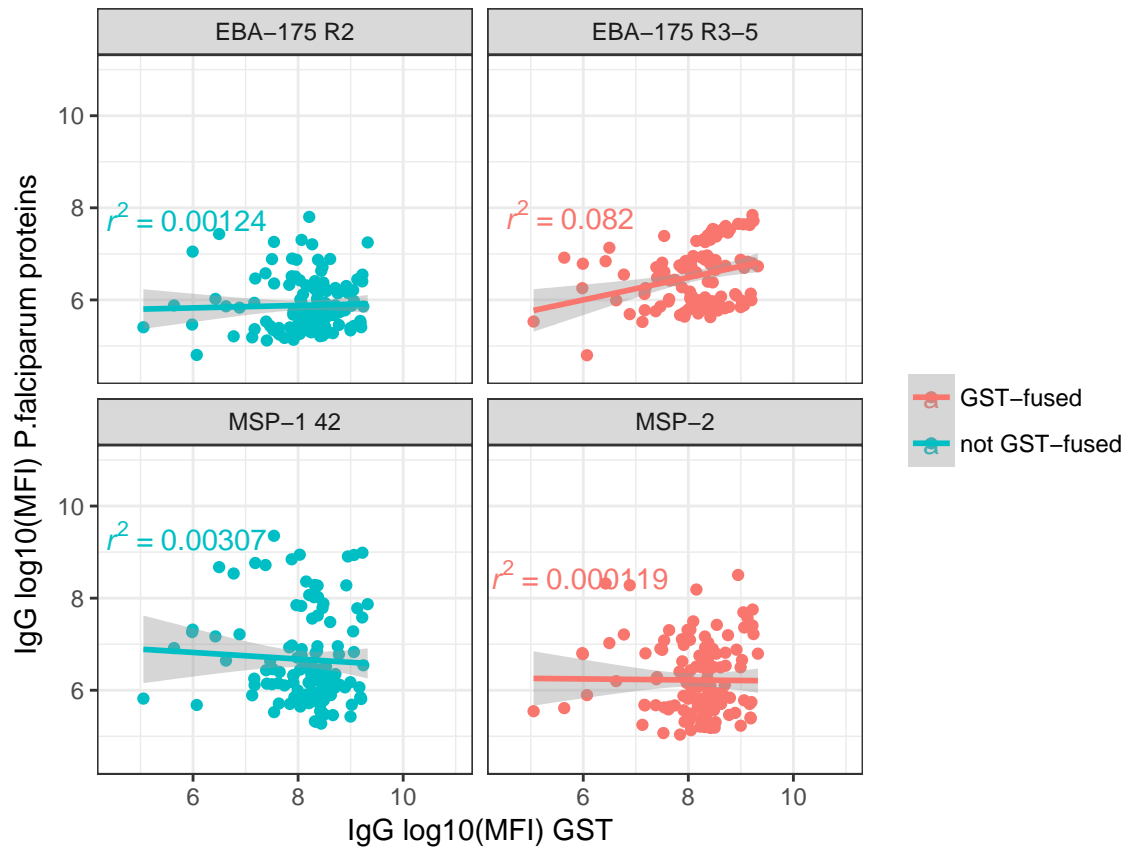

— GST-fused  
— not GST-fused

— GST-fused  
— not GST-fused
