# Supplementary material for: Optimization of incubation conditions of Plasmodium falciparum antibody multiplex assays to measure IgG, IgG1–4, IgM and IgE using standard and customized reference pools for sero-epidemiological and vaccine studies
Source: Malar J. 2018 Jun 1;17:219. doi: 10.1186/s12936-018-2369-3 (PMC5984756; doi:10.1186/s12936-018-2369-3)

# A. IgM curves with the IgM pool by incubation condition

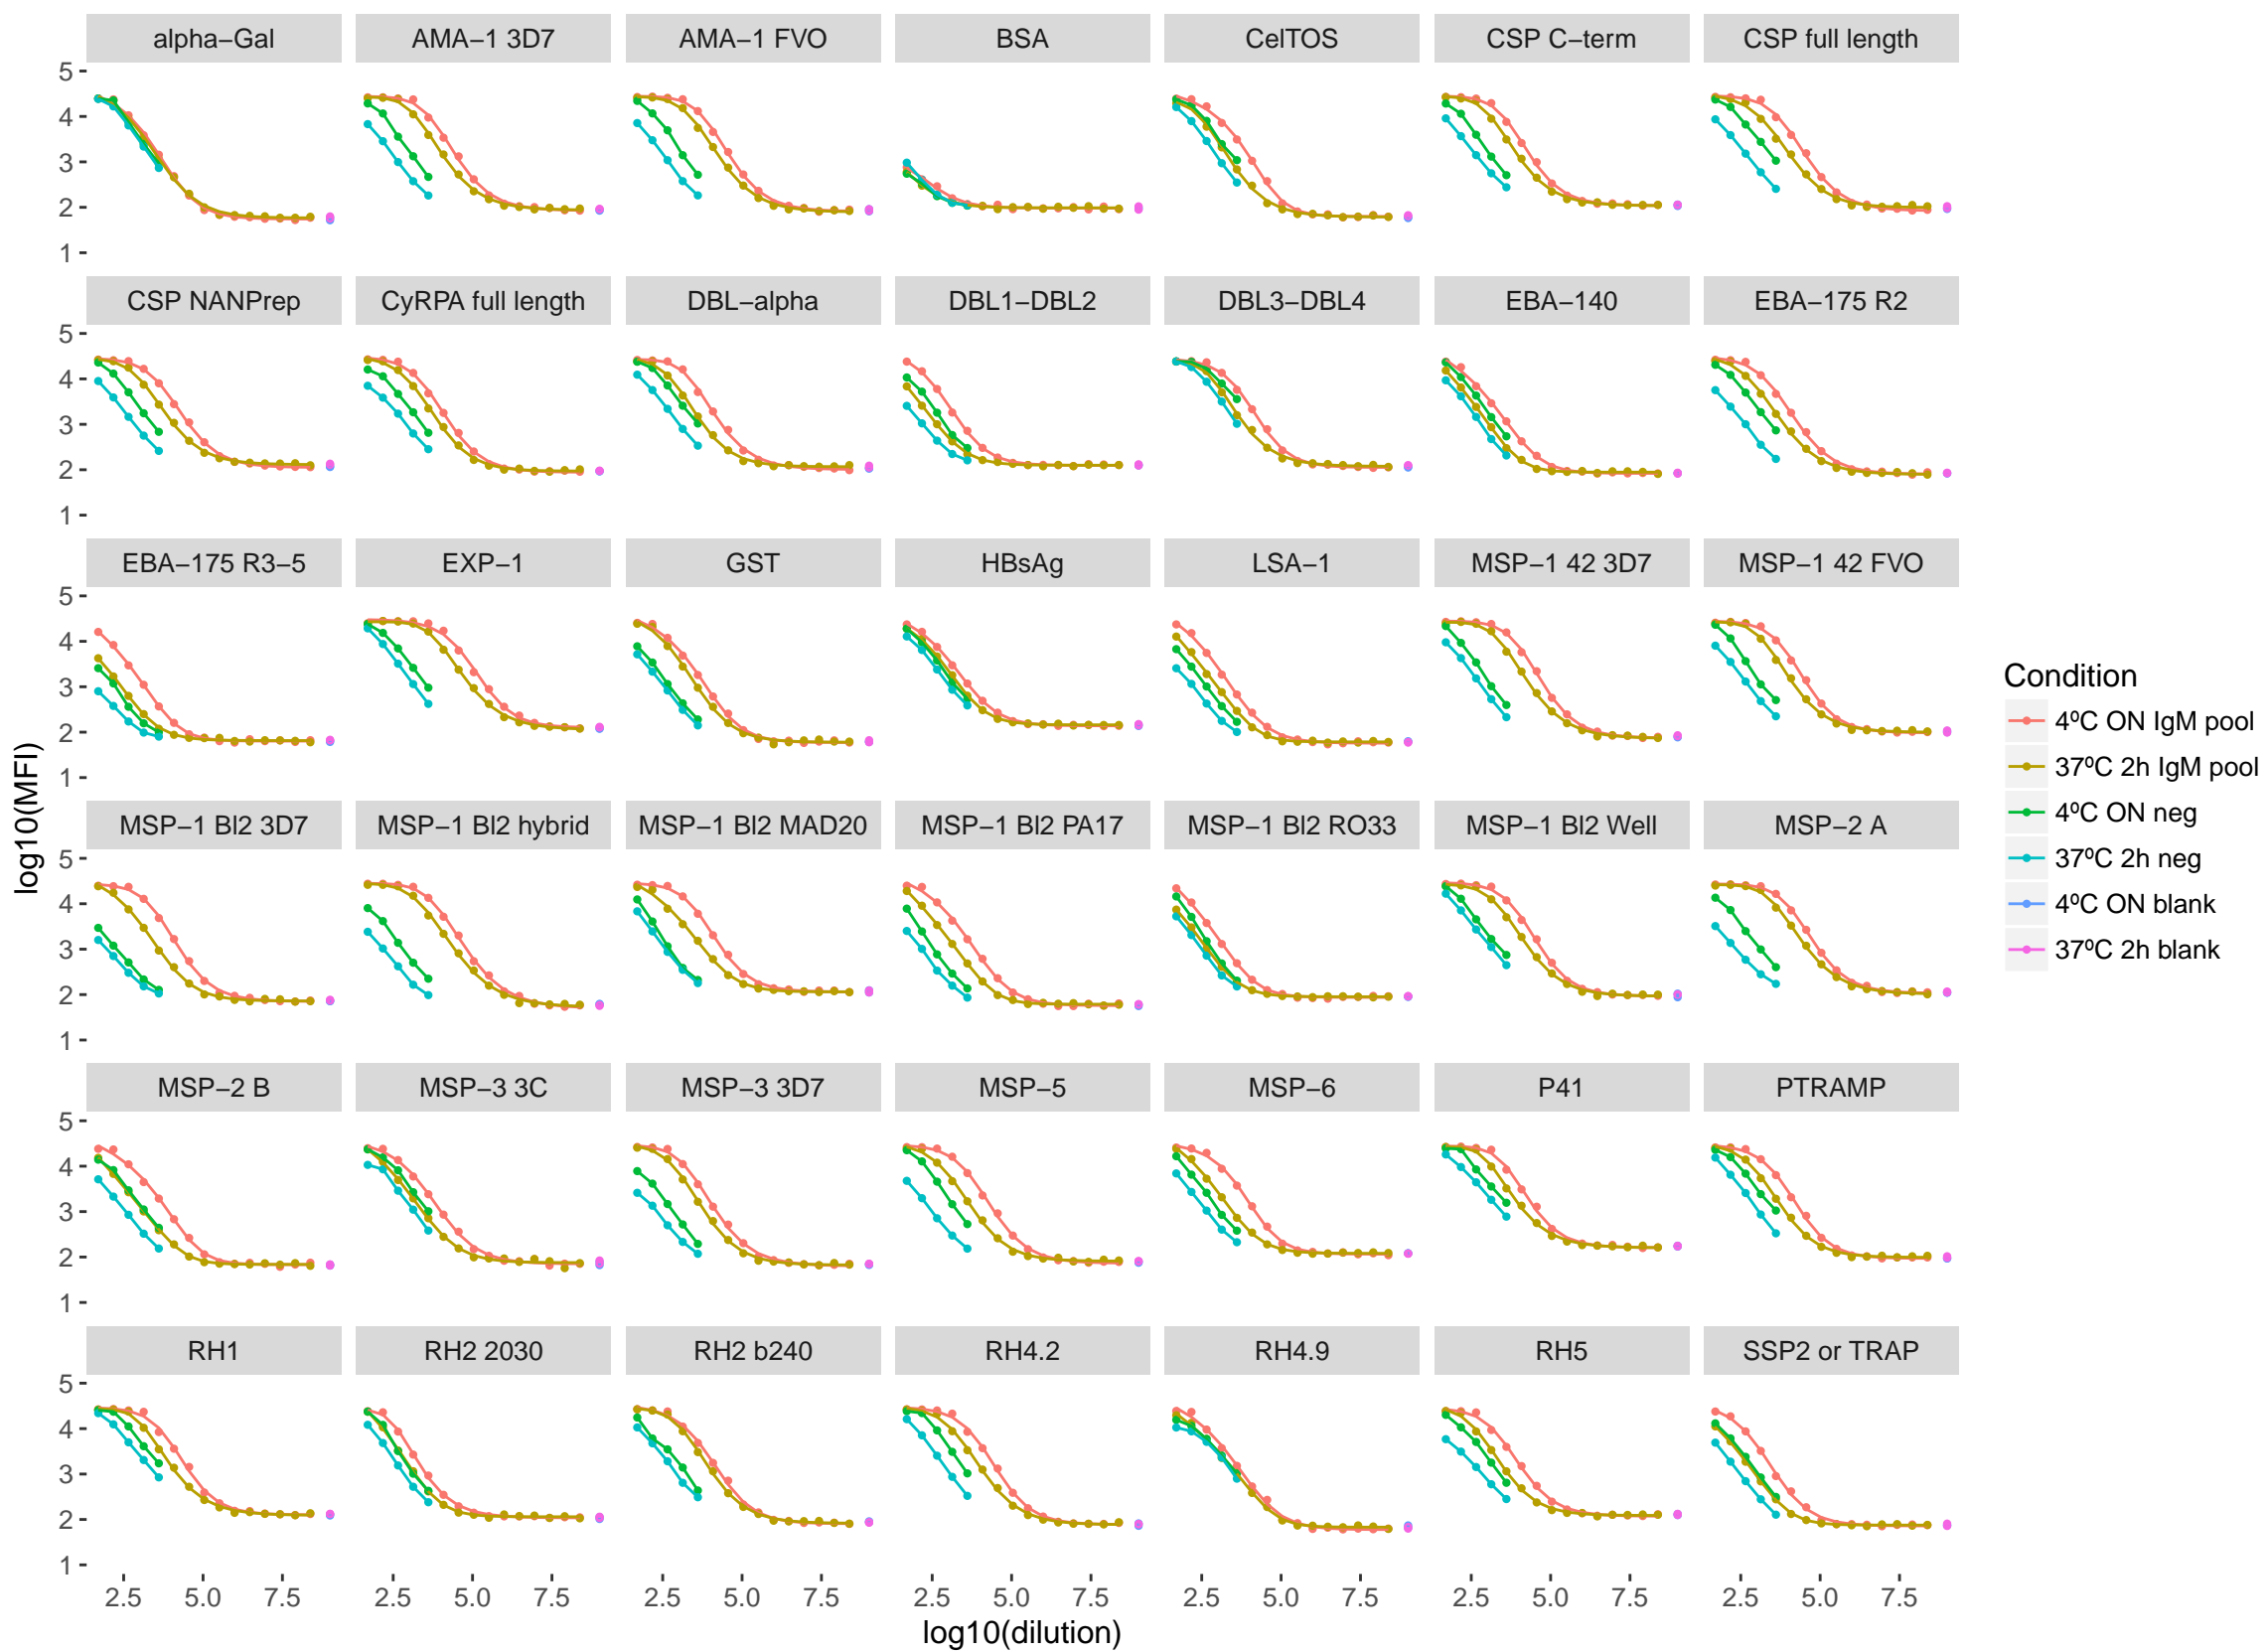

## B. IgM curves with the WHO reference reagent by incubation condition

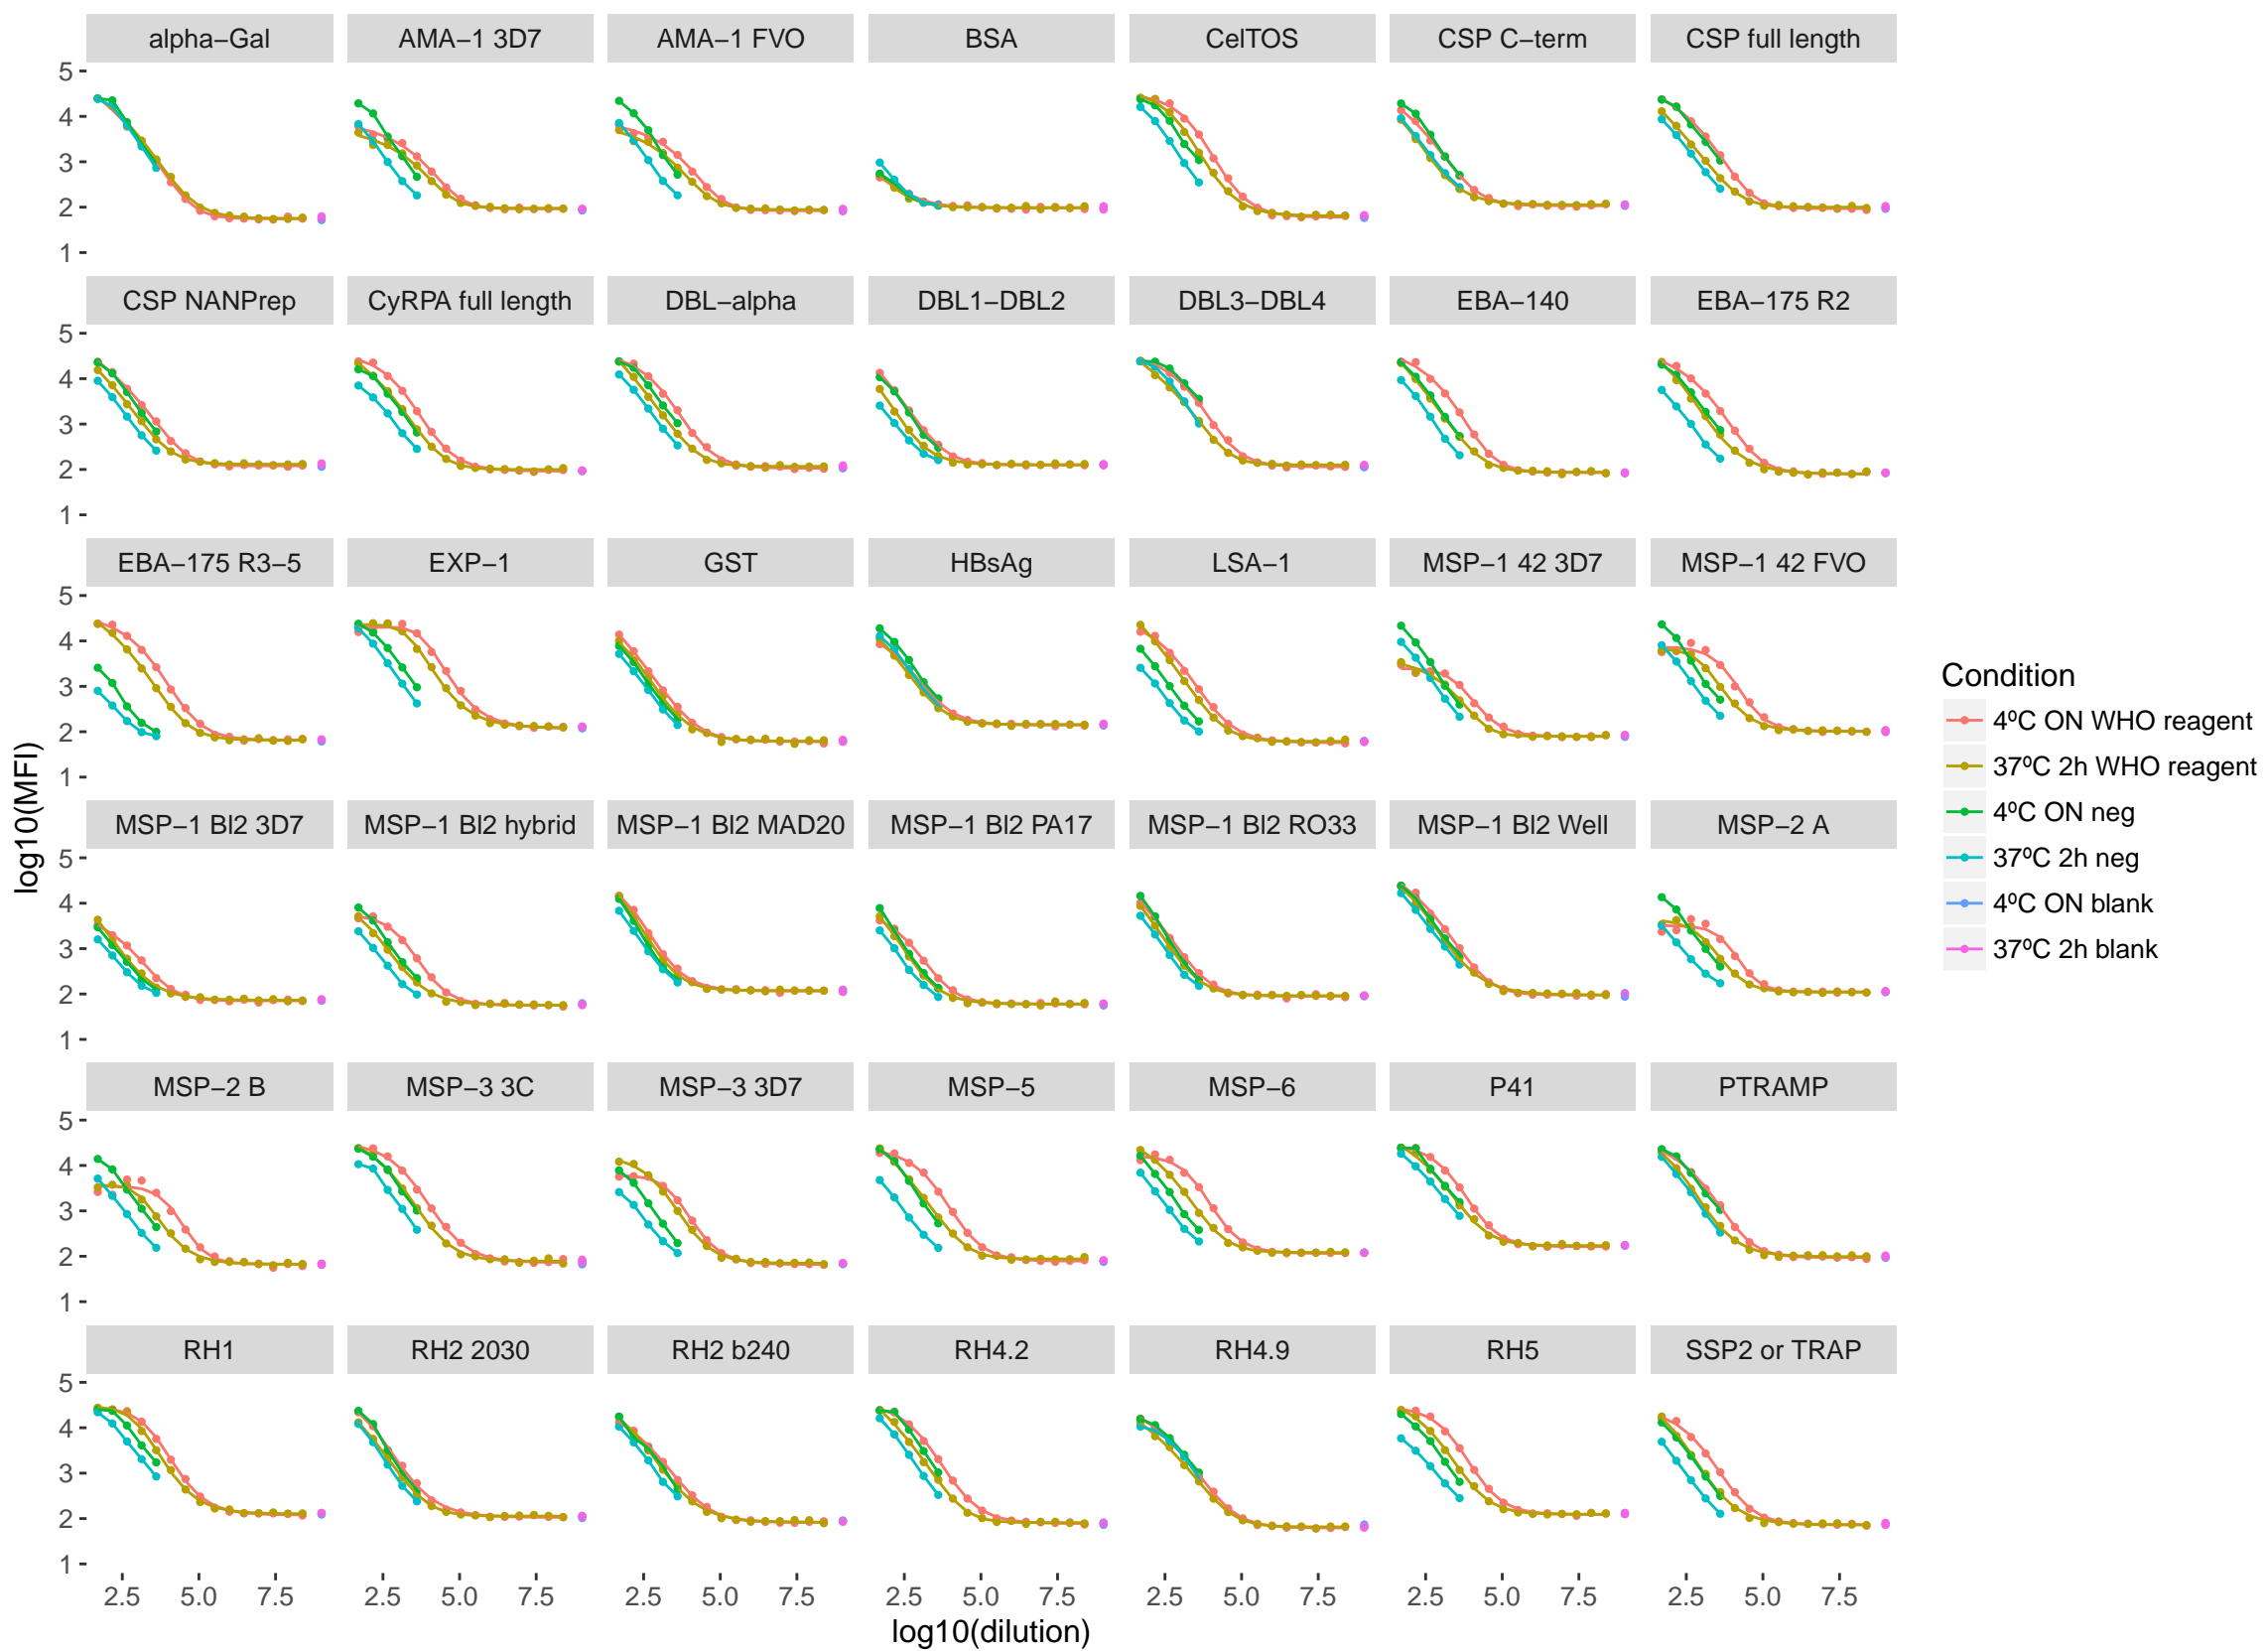

C. IgE curves with the WHO reference reagent by incubation condition

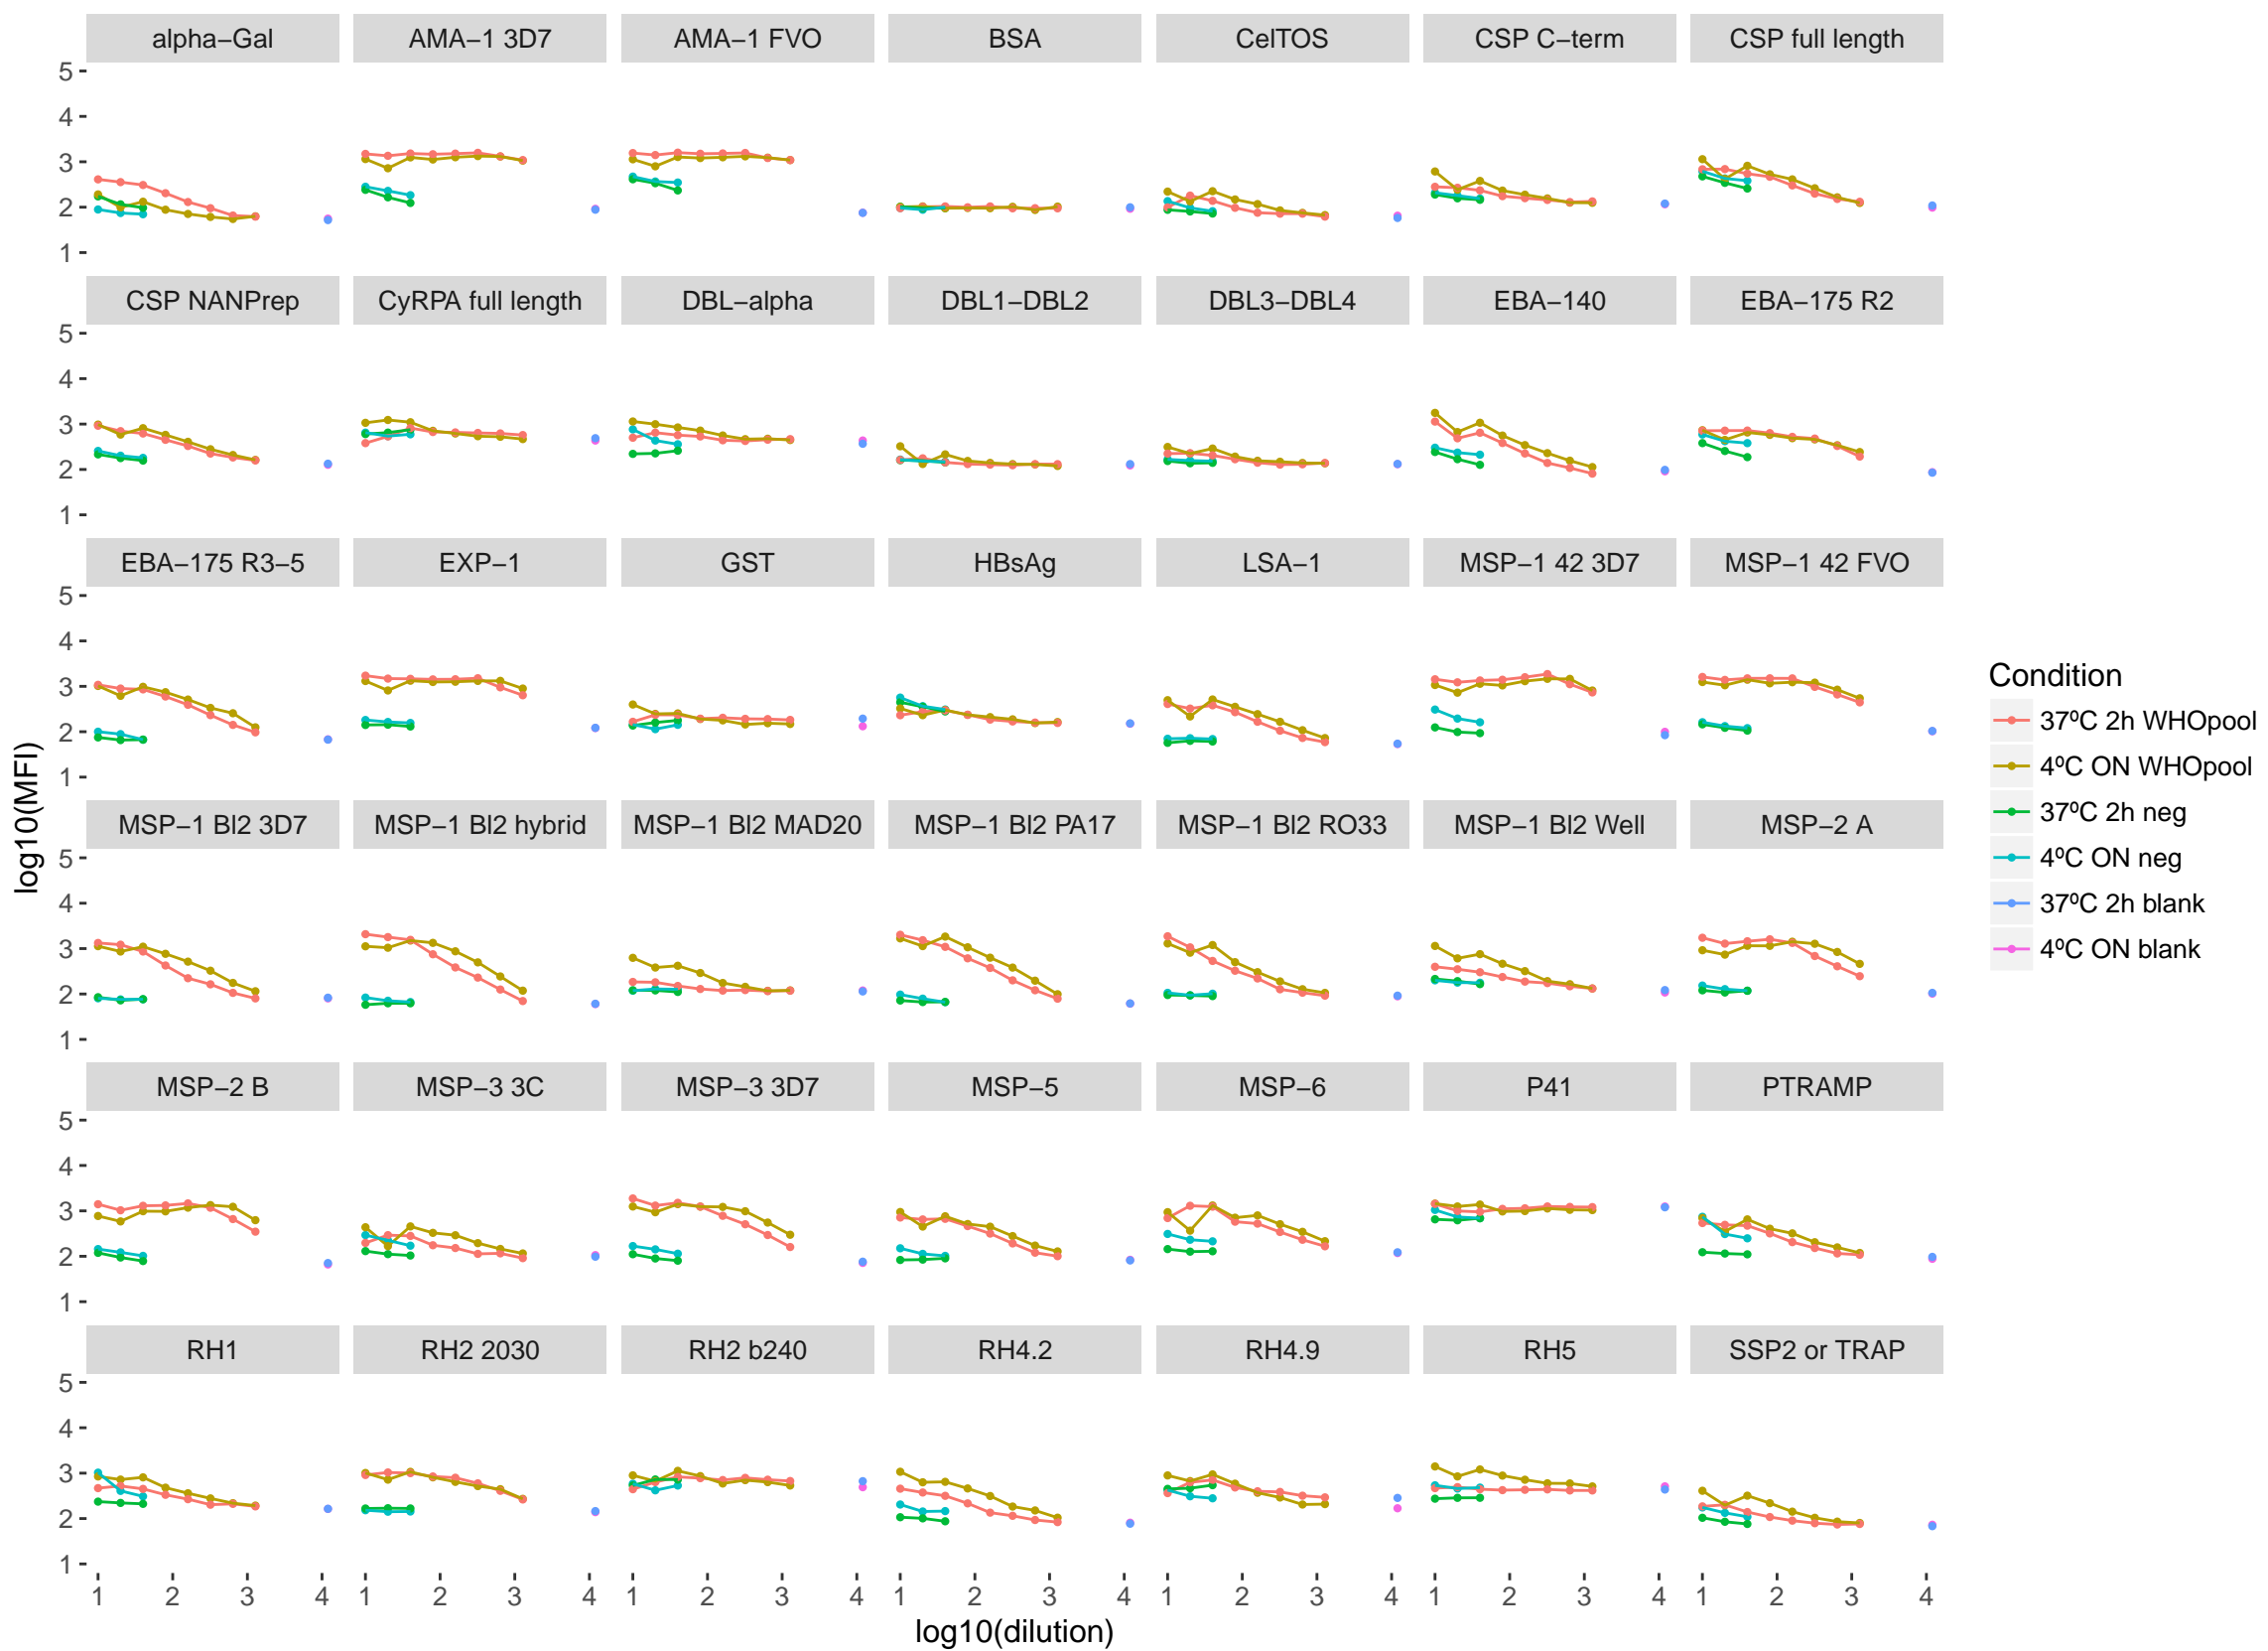

Supplement: Supplementary file 7 — Additional file 7. Levels of IgM and IgE measured to the 40-multiplex panel in the WHO reference reagent and IgM pool compared to negative control and blanks under two different incubation conditions. Incubation conditions compared are: 4 °C (4 °C ON) vs 2 h at 37 °C (37 °C 2 h). A) Predicted 5PL curves of IgM levels in the IgM pool. B) Predicted 5PL curves of IgM levels in the WHO reference reagent. C) IgE levels in the WHO reference reagent. [file 12936_2018_2369_MOESM7_ESM.pdf]
